# Supplementary material
Source: MDPI journal article supplement (https://www.mdpi.com/2073-4433/15/3/365)
Supplement: s1 [file s1]

Supplementary Materials for

# Culturable Microorganisms of Aerosols Sampled during Aircraft Sounding of the Atmosphere over the Russian Arctic Seas

Irina S. Andreeva <sup>1</sup>, Aleksandr S. Safatov <sup>1,\*</sup>, Larisa I. Puchkova <sup>1</sup>, Nadezhda A. Solovyanova <sup>1</sup>, Olesya V. Okhlopkova <sup>1</sup>, Maksim E. Rebus <sup>1</sup>, Galina A. Buryak <sup>1</sup>, Boris D. Belan <sup>2</sup> and Denis V. Simonenkov <sup>2</sup>

<sup>1</sup> Vector State Research Center for Virology and Biotechnology, Federal Service for Surveillance on Consumer Rights Protection and Human Welfare, 630559 Koltsovo, Novosibirsk Region, Russia; andreeva\_is@vector.nsc.ru (I.S.A.); puchkova\_li@vector.nsc.ru (L.I.P.); solovyanova\_na@vector.nsc.ru (N.A.S.); ohlopkova\_ov@vector.nsc.ru (O.V.O.); rebus\_me@vector.nsc.ru (M.E.R.); buryak@vector.nsc.ru (G.A.B.)

<sup>2</sup> Laboratory of Atmosphere Composition Climatology, V.E. Zuev Institute of Atmospheric Optics, Siberian Branch of Russian Academy of Sciences, 634055 Tomsk, Russia; bbd@iao.ru (B.D.B.); simon@iao.ru (D.V.S.)

\* Correspondence: safatov@mail.ru or safatov@vector.nsc.ru

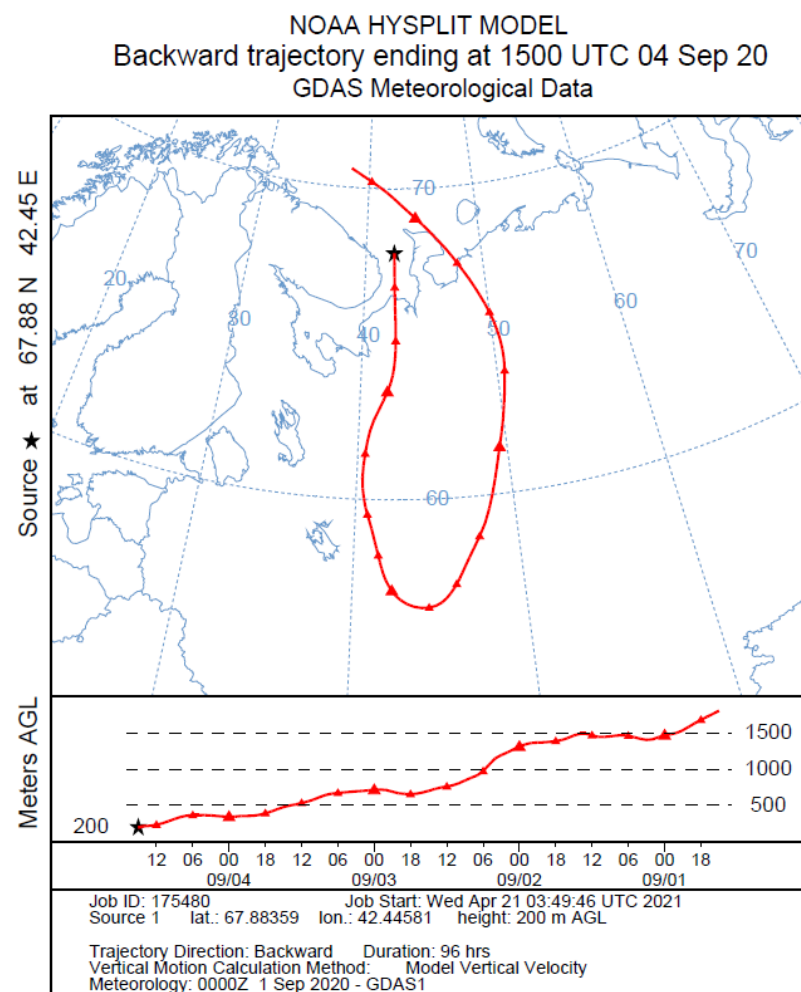

**Figure S1.** Backward trajectory of air masses from which an air sample was taken at an altitude of 200 m above the Barents Sea.

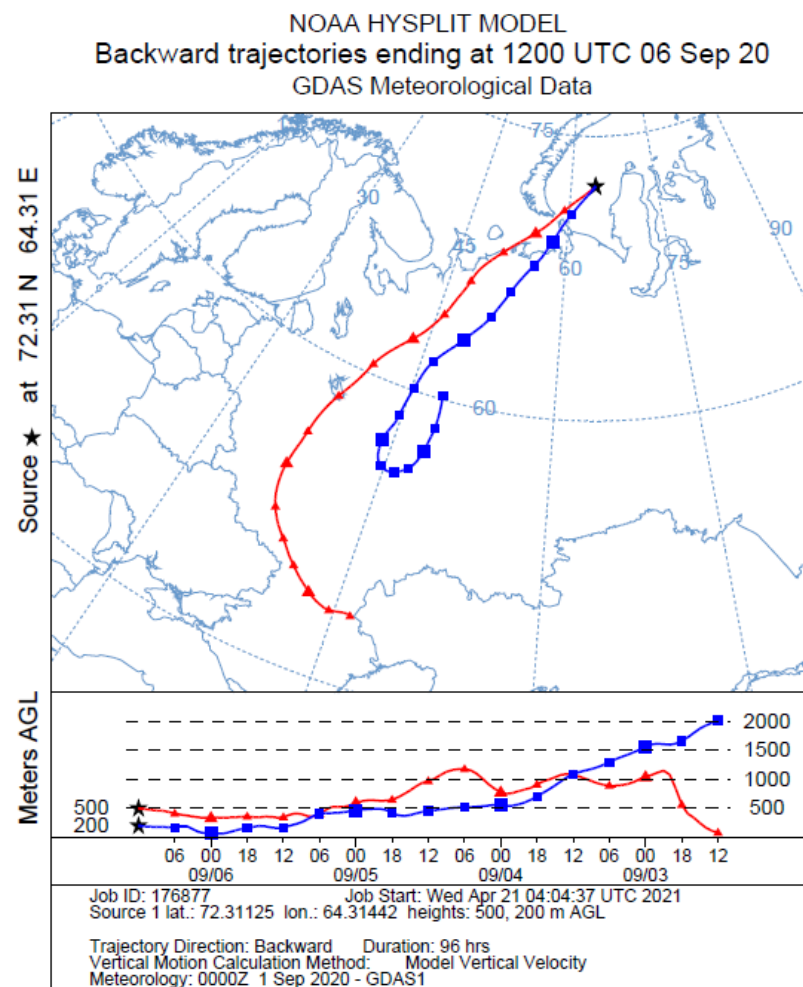

**Figure S2.** Backward trajectories of air masses from which an air sample was taken at altitudes of 200 - 500 m above the Kara Sea.

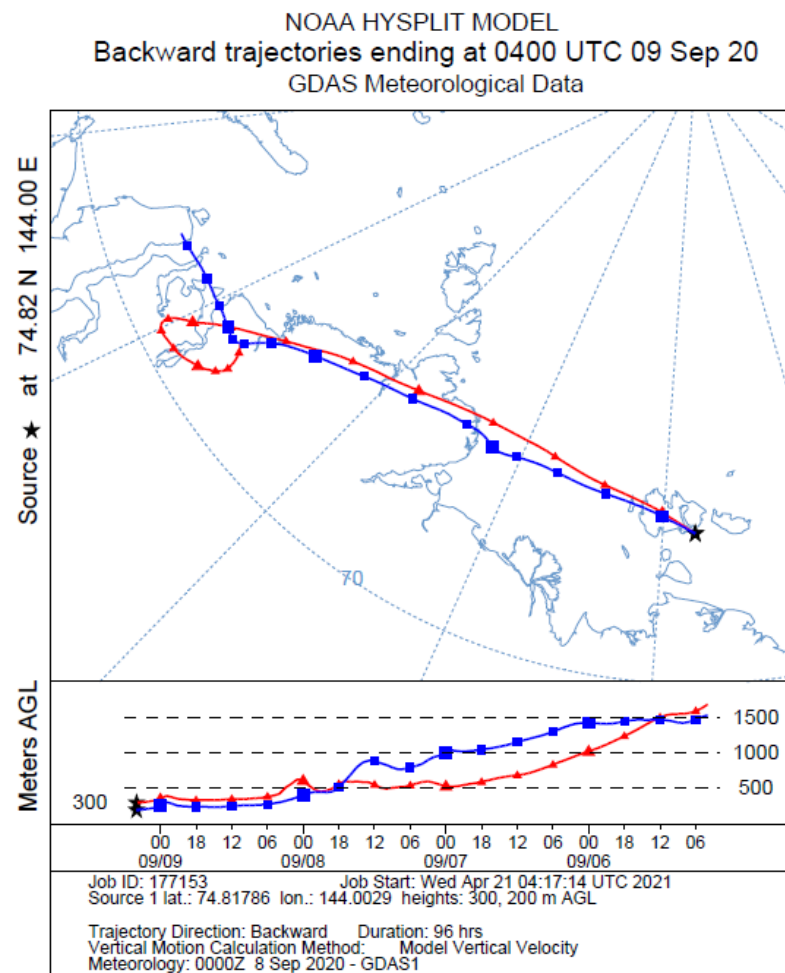

**Figure S3.** Backward trajectories of air masses from which an air sample was taken at altitudes of 200 - 300 m above the Laptev Sea.

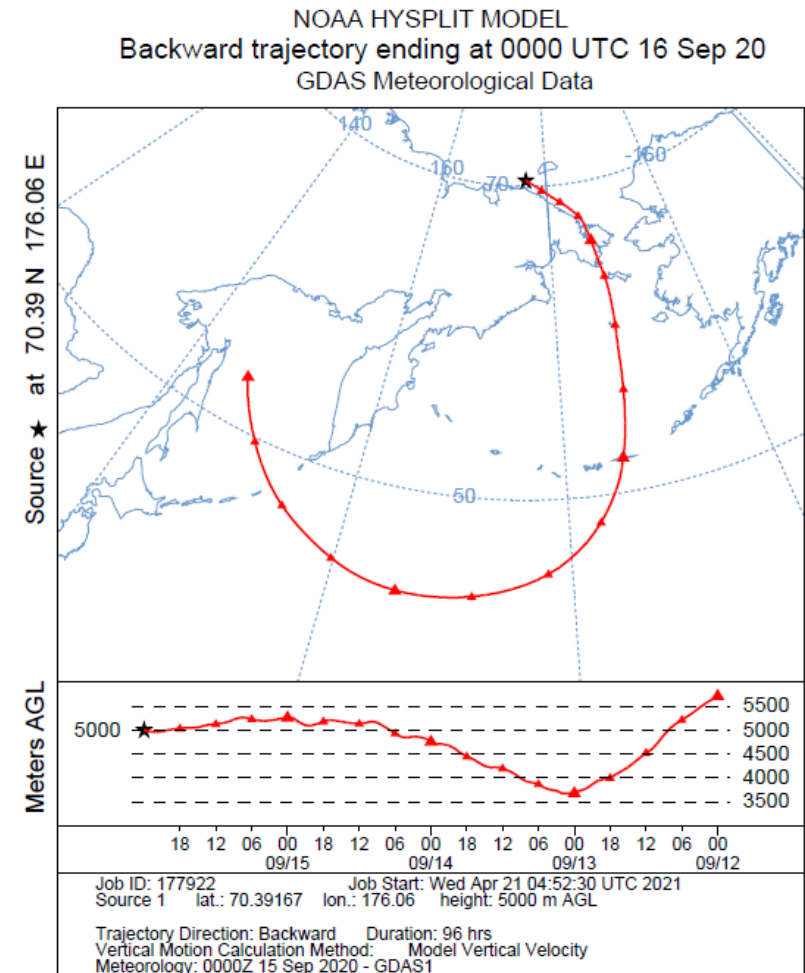

**Figure S4.** Backward trajectory of air masses from which an air sample was taken at an altitude of 500 m above the East Siberian Sea.

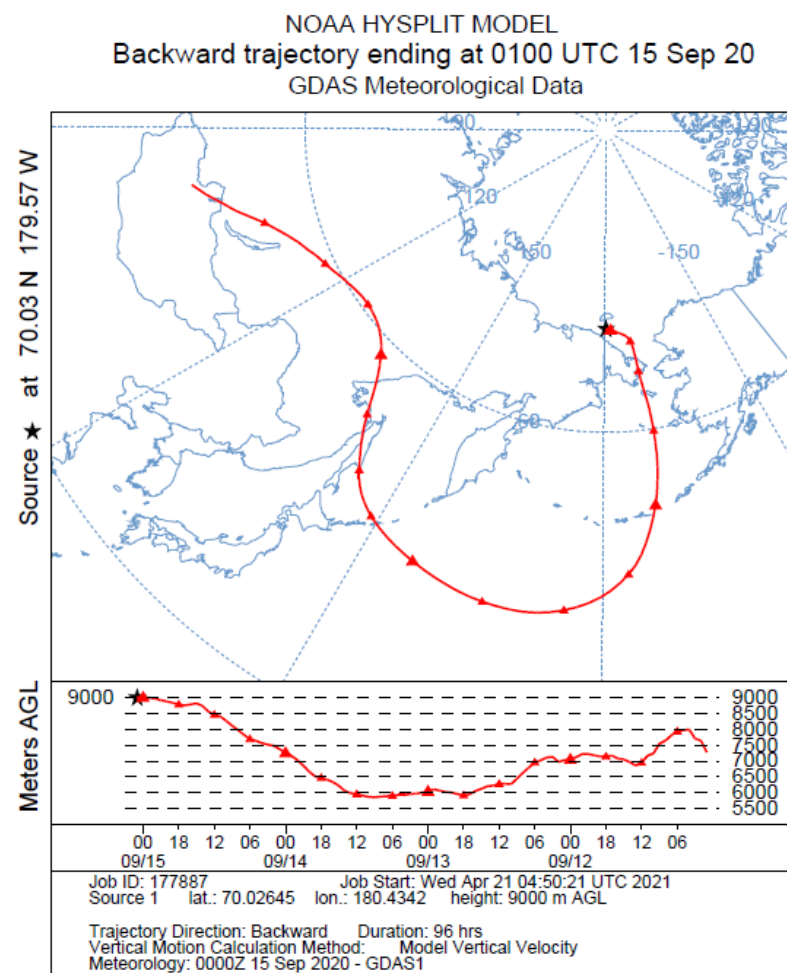

**Figure S5.** Backward trajectory of air masses from which an air sample was taken at an altitude of 9000 m above the Chukchi Sea.

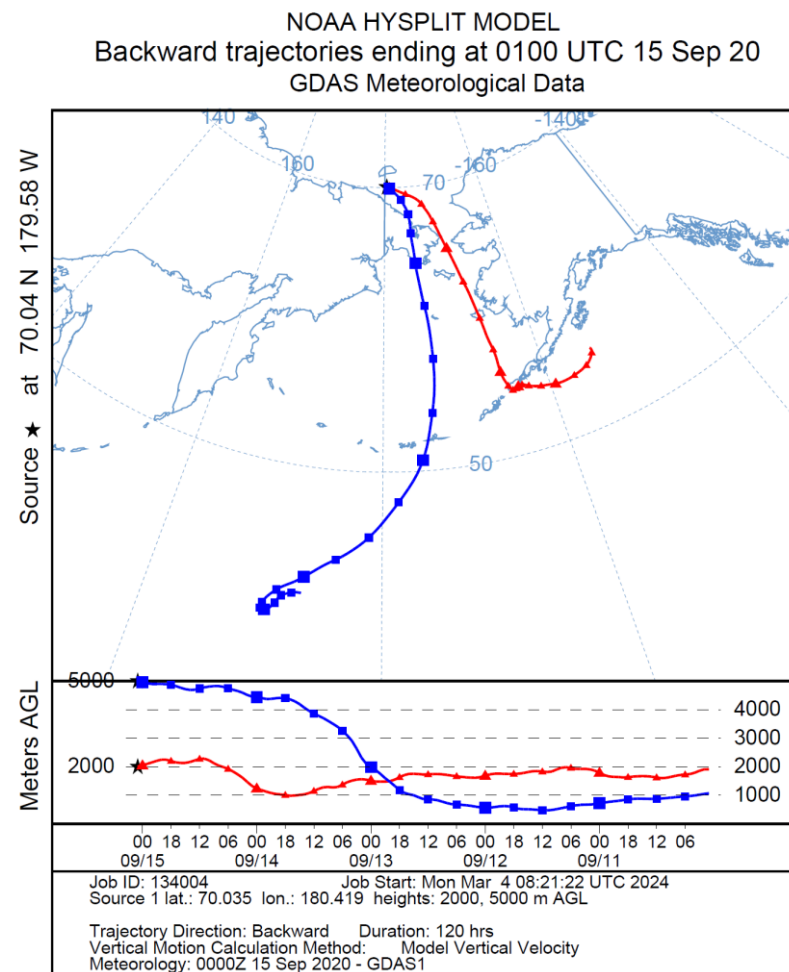

**Figure S6.** Backward trajectories of air masses from which an air sample was taken at altitudes 2000 – 5000 m above the Chukchi Sea.

**Table S1.** Antifungal effect of bacilli strains on the pathogenic strain of *Candida albicans* determined by the diffusion method on an agarized nutrient medium.

| Strains<br>bacilli | C. albicans FA-1 |            | Strains<br>bacilli | C. albicans FA-1 |            |
|--------------------|------------------|------------|--------------------|------------------|------------|
|                    | zone (mm)        |            |                    | zone (mm)        |            |
|                    | lysis            | oppression |                    | lysis            | oppression |
| Sp-12              | 25               | 20         | Sp-81              | -                | 40         |
| Sp-17              | 38               | 7          | Sp-82              | 30               | 15         |
| Sp-48              | 35               | 20         | Sp-83              | -                | 40         |
| Sp-50              | 30               | 15         | Sp-86              | 20               | 25         |
| Sp-59              | 25               | 20         | Sp-86-1            | 25               | 20         |
| Sp-56              | 25               | 20         | Sp-90              | 30               | 15         |
| Sp-60              | 35               | 10         | Sp-91              | 25               | 20         |
| Sp-62              | -                | 45         | Sp-95              | -                | 40         |
| Sp-64              | 25               | 20         | Sp-100             | 25               | 20         |
| Sp-67              | 25               | 20         | Sp-104             | -                | 40         |
| Sp-69              | 35               | 10         | Sp-105             | 35               | 10         |
| Sp-70              | 38               | 7          | Sp-109             | -                | 40         |
| Sp-71              | 35               | 10         | Sp-110             | 25               | 20         |
| Sp-75              | 35               | 10         | Sp-111             | -                | 40         |
| Sp-79              | 30               | 15         | Sp-120             | 35               | 10         |
| Sp-80              | -                | 40         | Sp-140             | 37               | 8          |

**Table S2.** Sensitivity determination to antibiotics of strains belonging to the group of staphylococci using the disk diffusion method.

| Strain                                           | Antibiotic, amount on the disk / zone of inhibition or lysis, mm |                      |                  |                   |                    |                         |                  | Strain                                | Antibiotic, amount on the disk / zone of inhibition or lysis, mm |                      |                  |                   |                    |                         |                  |
|--------------------------------------------------|------------------------------------------------------------------|----------------------|------------------|-------------------|--------------------|-------------------------|------------------|---------------------------------------|------------------------------------------------------------------|----------------------|------------------|-------------------|--------------------|-------------------------|------------------|
|                                                  | Gentomycin, 10 µg                                                | Ciprofloxacin, 30 µg | Kanamycin, 30 µg | Vancomycin, 30 µg | Levofloxacin, 5 µg | Benzy/penicillin, 10 IU | Oxacillin, 10 µg |                                       | Gentomycin, 10 µg                                                | Ciprofloxacin, 30 µg | Kanamycin, 30 µg | Vancomycin, 30 µg | Levofloxacin, 5 µg | Benzy/penicillin, 10 IU | Oxacillin, 10 µg |
| <b>Sp-3</b>                                      | 24                                                               | 30                   | 22               | 18                | 26                 | 30                      | 26               | <b>Sp-52</b>                          | 30                                                               | 28                   | 26               | 20                | 28                 | 30                      | 24               |
| <b>Sp-6</b>                                      | 25                                                               | 16                   | 20               | 15                | 20                 | 37                      | 25               | <b>Sp-53</b>                          | 25                                                               | 30                   | 28               | 26                | 30                 | 30                      | 30               |
| <b>Sp-7</b>                                      | 40                                                               | 38                   | 30               | 38                | 32                 | 45                      | 42               | <b>Sp-61</b>                          | 25                                                               | 24                   | 22               | 20                | 30                 | 12                      | 25               |
| <b>Sp-9</b>                                      | 10                                                               | 40                   | 0                | 20                | 30                 | 45                      | 34               | <b>Sp-85</b>                          | 27                                                               | 25                   | 24               | 16                | 26                 | 26                      | 20               |
| <b>Sp-10</b>                                     | 22                                                               | 32                   | 15               | 20                | 28                 | 36                      | 30               | <b>Sp-87</b>                          | 24                                                               | 20                   | 12               | 18                | 24                 | 20                      | 16               |
| <b>Sp-13</b>                                     | 27                                                               | 25                   | 20               | 15                | 30                 | 32                      | 30               | <b>Sp-89</b>                          | 30                                                               | 30                   | 26               | 20                | 25                 | 24                      | 28               |
| <b>Sp-28</b>                                     | 30                                                               | 20                   | 22               | 18                | 15                 | 15                      | 35               | <b>Sp-92</b>                          | 30                                                               | 30                   | 25               | 25                | 30                 | 26                      | 39               |
| <b>Sp-33</b>                                     | 28                                                               | 30                   | 25               | 30                | 35                 | 30                      | 29               | <b>Sp-93</b>                          | 30                                                               | 30                   | 24               | 25                | 28                 | 30                      | 30               |
| <b>Sp-35</b>                                     | 27                                                               | 26                   | 22               | 17                | 28                 | 21                      | 25               | <b>Sp-97</b>                          | 22                                                               | 20                   | 18               | 14                | 22                 | 0                       | 0                |
| <b>Sp-36</b>                                     | 27                                                               | 22                   | 21               | 18                | 23                 | 16                      | 27               | <b>Sp-99</b>                          | 22                                                               | 24                   | 20               | 16                | 22                 | 0                       | 20               |
| <b>Sp-37</b>                                     | 14                                                               | 30                   | 0                | 16                | 25                 | 12                      | 25               | <b>Sp-108</b>                         | 22                                                               | 20                   | 22               | 15                | 17                 | 20                      | 17               |
| <b>Sp-39</b>                                     | 20                                                               | 12                   | 18               | 15                | 23                 | 35                      | 26               | <b>Sp-112</b>                         | 30                                                               | 25                   | 26               | 20                | 30                 | 18                      | 32               |
| <b>Sp-40</b>                                     | 30                                                               | 25                   | 20               | 18                | 22                 | 32                      | 28               | <b>Sp-113</b>                         | 15                                                               | 27                   | 10               | 13                | 23                 | 0                       | 22 <sub>A</sub>  |
| <b>Sp-41</b>                                     | 25                                                               | 24                   | 18               | 16                | 22                 | 34                      | 22               | <b>Sp-121</b>                         | 32                                                               | 27                   | 23               | 20                | 25                 | 20                      | 26               |
| <b>Sp-42</b>                                     | 28                                                               | 30                   | 0                | 18                | 25                 | 28                      | 25               | <b>Sp-124</b>                         | 28                                                               | 22                   | 10               | 20                | 22                 | 15                      | 24               |
| <b>Sp-43</b>                                     | 25                                                               | 30                   | 28               | 18                | 32                 | 35                      | 30               | <b>Sp-125</b>                         | 18                                                               | 24                   | 22               | 18                | 20                 | 35                      | 30               |
| <b>Sp-50</b>                                     | 30                                                               | 40                   | 25               | 22                | 32                 | 40                      | 35               | <b>Sp-135</b>                         | 22                                                               | 20                   | 18               | 18                | 24                 | 25                      | 23               |
| <b>Sp-51</b>                                     | 22                                                               | 24                   | 28               | 20                | 32                 | 32                      | 30               | <b>Sp-136</b>                         | 14                                                               | 22                   | 0                | 14                | 22                 | 12                      | 22               |
| <b>S. epide-<br/>rmidis<br/>MRSE,<br/>B-1350</b> | 0                                                                | 0                    | 0                | 21                | 0                  | 0                       | 0                | <b>S. aureus<br/>MRSA,<br/>B-1352</b> | 0                                                                | 0                    | 0                | 5                 | 0                  | 0                       | 0                |
| <b>S. aureus<br/>B-1266</b>                      | 24                                                               | 25                   | 15               | 20                | 21                 | 35                      | 22               |                                       |                                                                  |                      |                  |                   |                    |                         |                  |

*Note:* when considering the results, recommendations were applied to the use of a set of disks to determine the sensitivity of staphylococci to antimicrobial drugs (APD) DI-PLS-50-01 according to TU 9398-001-39484474-2000 produced by Russian Federation LLC Scientific Research Center for Pharmacotherapy. Strains resistant to a given antibiotic are highlighted in color.

**Table S3.** Interpretation of growth retardation zone diameters in determining the sensitivity of cocci to antimicrobial agents by disk-diffusion method.

| Antibiotic, amount on the disk | Diameter of culture zones, in mm |              |           |
|--------------------------------|----------------------------------|--------------|-----------|
|                                | Resistant                        | Intermediate | Sensitive |
| Gentomycin, 10 µg              | ≤14                              | 15-16        | ≥17       |
| Ciprofloxacin, 30 µg           | ≤15                              | 16-20        | ≥21       |
| Kanamycin, 30 µg               | ≤14                              | 15-18        | ≥19       |
| Vancomycin, 30 µg              | ≤14                              | -            | ≥15       |
| Levofloxacin, 5 µg             | ≤13                              | 14-16        | ≥17       |
| Oxacillin, 10 µg               | ≤11                              | 12-13        | ≥14       |
| Benzympenicillin, 10 IU        | ≤28                              | -            | ≥29       |

**Table S4.** Sensitivity determination to antibiotics by the disk diffusion method of strains of spore-forming bacteria.

| Strain                  | Antibiotic, amount on the disk / zone of inhibition or lysis, mm |                      |                   |                  |                     |                    |                   | Strain                   | Antibiotic, amount on the disk / zone of inhibition or lysis, mm |                      |                   |                  |                     |                    |                   |
|-------------------------|------------------------------------------------------------------|----------------------|-------------------|------------------|---------------------|--------------------|-------------------|--------------------------|------------------------------------------------------------------|----------------------|-------------------|------------------|---------------------|--------------------|-------------------|
|                         | Imipenem, 10 µg                                                  | Ciprofloxacin, 30 µg | Vancomycin, 30 µg | Linezolid, 30 µg | Γ Gentomycin, 10 µg | Norfloxacin, 10 µg | Levofloxacin 5 µg |                          | Imipenem, 10 µg                                                  | Ciprofloxacin, 30 µg | Vancomycin, 30 µg | Linezolid, 30 µg | Γ Gentomycin, 10 µg | Norfloxacin, 10 µg | Levofloxacin 5 µg |
| <b>Sp-11</b>            | 26                                                               | 20                   | 20                | 30               | 18                  | 15                 | 15                | <b>Sp-74</b>             | 22                                                               | 20                   | 18                | 24               | 15                  | 12                 | 20                |
| <b>Sp-12</b>            | 30                                                               | 30                   | 16                | 25               | 20                  | 22                 | 28                | <b>Sp-140</b>            | 20                                                               | 17                   | 14                | 20               | 15                  | 10                 | 14                |
| <b>Sp-32</b>            | 0                                                                | 20                   | 14                | 22               | 12                  | 0                  | 13                | <b>Sp-141</b>            | 25                                                               | 24                   | 16                | 20               | 18                  | 16                 | 22                |
| <b>Sp-50</b>            | 25                                                               | 24                   | 20                | 26               | 20                  | 20                 | 25                | <b>Sp-75</b>             | 15                                                               | 22                   | 15                | 25               | 18                  | 15                 | 22                |
| <b>Sp-59</b>            | 20                                                               | 25                   | 13                | 18               | 16                  | 14                 | 20                | <b>Sp-78</b>             | 24                                                               | 25                   | 20                | 28               | 26                  | 24                 | 20                |
| <b>Sp-60</b>            | 17                                                               | 20                   | 15                | 18               | 15                  | 16                 | 20                | <b>Sp-79</b>             | 25                                                               | 23                   | 20                | 25               | 16                  | 17                 | 24                |
| <b>Sp-56</b>            | 20                                                               | 23                   | 15                | 18               | 15                  | 16                 | 22                | <b>Sp-80</b>             | 24                                                               | 25                   | 16                | 20               | 18                  | 16                 | 25                |
| <b>Sp-64</b>            | 20                                                               | 24                   | 14                | 20               | 18                  | 17                 | 20                | <b>Sp-81</b>             | 21                                                               | 25                   | 15                | 23               | 17                  | 18                 | 24                |
| <b>Sp-62</b>            | 20                                                               | 24                   | 14                | 22               | 16                  | 18                 | 20                | <b>Sp-82</b>             | 25                                                               | 25                   | 18                | 23               | 20                  | 18                 | 28                |
| <b>Sp-67</b>            | 28                                                               | 25                   | 15                | 24               | 16                  | 18                 | 26                | <b>Sp-86</b>             | 20                                                               | 22                   | 18                | 25               | 20                  | 18                 | 25                |
| <b>Sp-69</b>            | 18                                                               | 0                    | 11                | 18               | 15                  | 10                 | 9                 | <b>Sp-83</b>             | 22                                                               | 20                   | 16                | 22               | 18                  | 20                 | 22                |
| <b>Sp-70</b>            | 19                                                               | 9                    | 14                | 18               | 15                  | 16                 | 18                | <b>Sp-90</b>             | 0                                                                | 8                    | 14                | 21               | 15                  | 15                 | 20                |
| <b>Sp-71</b>            | 15                                                               | 12                   | 15                | 16               | 14                  | 15                 | 20                | <b>Sp-91</b>             | 22                                                               | 24                   | 20                | 22               | 15                  | 20                 | 22                |
| <b>Sp-95</b>            | 15                                                               | 25                   | 26                | 20               | 18                  | 15                 | 25                | <b>Sp-109</b>            | 19                                                               | 20                   | 16                | 24               | 14                  | 20                 | 20                |
| <b>Sp-96</b>            | 22                                                               | 16                   | 18                | 20               | 15                  | 16                 | 15                | <b>Sp-110</b>            | 18                                                               | 26                   | 16                | 24               | 18                  | 15                 | 20                |
| <b>Sp-139</b>           | 20                                                               | 23                   | 10                | 0                | 14                  | 20                 | 18                | <b>Sp-111</b>            | 25                                                               | 15                   | 22                | 25               | 17                  | 16                 | 23                |
| <b>Sp-100</b>           | 20                                                               | 24                   | 16                | 24               | 16                  | 16                 | 10                | <b>Sp-117</b>            | 25                                                               | 22                   | 15                | 23               | 17                  | 18                 | 24                |
| <b>Sp-101</b>           | 26                                                               | 27                   | 18                | 23               | 18                  | 20                 | 25                | <b>Sp-120</b>            | 18                                                               | 20                   | 13                | 18               | 18                  | 15                 | 17                |
| <b>Sp-104</b>           | 25                                                               | 26                   | 16                | 22               | 18                  | 16                 | 13                | <b>Sp-127</b>            | 14                                                               | 15                   | 8                 | 8                | 12                  | 16                 | 16                |
| <b>Sp-105</b>           | 20                                                               | 22                   | 18                | 26               | 18                  | 18                 | 25                | <b>Sp-138-2</b>          | 22                                                               | 25                   | 16                | 24               | 14                  | 15                 | 24                |
| <b>E. coli B-1373</b>   | 16                                                               | 20                   | 6                 | 0                | 17                  | 21                 | 22                | <b>B.subtilis B-1376</b> | 18                                                               | 10                   | 14                | 20               | 18                  | 16                 | 12                |
| <b>B. cereus B-1367</b> | 22                                                               | 12                   | 7                 | 28               | 17                  | 16                 | 22                |                          |                                                                  |                      |                   |                  |                     |                    |                   |

*Note:* when considering the results, recommendations were applied to the use of a set of disks to determine the sensitivity of staphylococci to antimicrobial drugs (APD) DI-PLS-50-01 according to TU 9398-001-39484474-2000 produced by LLC Scientific Research Center for Pharmacotherapy.

**Table S5.** Interpretation of growth retardation zone diameters in determining the sensitivity of strains of spore-forming bacteria to antimicrobial agents by disk-diffusion method.

| Antibiotic, amount on the disk | Diameter of culture zones, mm |              |           |
|--------------------------------|-------------------------------|--------------|-----------|
|                                | Resistant                     | Intermediate | Sensitive |
| Gentomycin, 10 µg              | ≤12                           | 13-14        | ≥15       |
| Ciprofloxacin, 30 µg           | ≤15                           | 16-20        | ≥21       |
| Vancomycin, 30 µg              | ≤14                           | 15-16        | ≥17       |
| Levofloxacin 5 µg              | ≤13                           | 14-16        | ≥17       |
| Norfloxacin, 10 µg             | ≤12                           | 13-16        | ≥17       |
| Imipenem, 10 µg                | ≤13                           | 14-15        | ≥16       |
| Linezolid, 30 µg               | ≤20                           | -            | ≥21       |
